# Supplementary material
Source: PubMed Central journal article supplement (PMC6142914)
Supplement: jamapediatr-172-e181029-s001.pdf [file jamapediatr-172-e181029-s001.pdf]

## Supplementary Online Content

Bierman KL, Welsh J, Heinrichs BS, Nix RL. Effect of preschool home visiting on school readiness and need for services in elementary school: a randomized clinical trial. *JAMA Pediatr*. Published online June 4, 2018. doi:10.1001/jamapediatrics.2018.1029

**eTable.** Baseline Means for Measures That Are Missing vs Available in Third Grade

This supplementary material has been provided by the authors to give readers additional information about their work.

**eTable.** Baseline Means for Measures That Are Missing vs Available in Third Grade

|                                  | <u>Missing</u> |        | <u>Available</u> |        | <u>Comparison</u> |
|----------------------------------|----------------|--------|------------------|--------|-------------------|
|                                  | Mean           | (SD)   | Mean             | (SD)   | P-Value           |
| <u>Demographics</u>              |                |        |                  |        |                   |
| Child sex (female)               | 43%            | (.50)  | 44%              | (.50)  | .82               |
| Race/ethnicity<br>(Latinx/Black) | 46%            | (.50)  | 43%              | (.50)  | .66               |
| High school education or<br>less | 57%            | (.49)  | 63%              | (.49)  | .51               |
| Full-time employment             | 20%            | (.44)  | 25%              | (.39)  | .42               |
| County (urban)                   | 57%            | (.49)  | 70%              | (.45)  | .10               |
| <u>Outcome Baseline</u>          |                |        |                  |        |                   |
| <u>Covariates</u>                |                |        |                  |        |                   |
| Emergent literacy skills         | .05            | (1.00) | -.06             | (1.05) | .48               |
| Applied problems                 | 11.70          | (4.17) | 10.84            | (3.84) | .19               |
| Task orientation                 | 2.66           | (.47)  | 2.63             | (.51)  | .74               |
| Social understanding             | .05            | (.56)  | .02              | (.51)  | .78               |
| Home problems                    | 10.37          | (5.31) | 9.96             | (4.82) | .62               |
| Parenting stress                 | 1.79           | (.59)  | 1.78             | (.57)  | .91               |
| Need for services                | .19            | (.26)  | .16              | (.22)  | .49               |

Notes: N (missing) = 47; n (retained at grade 3) = 153. For the purpose of comparing baseline values for measures that are missing or available in third grade, the variable used as the baseline covariate is shown. This is either the same measure as that collected in third grade or the developmentally-equivalent measure that was collected in preschool. Demographic scores represent the percent of children missing or available who were female, Latinx/Black, and the percent of primary caregivers missing or available who, at baseline, were employed full-time, had no post-high school training or education, and lived in the urban county site. P-values for the percentages in the top half of the table are based on  $\chi^2$  tests; P-values for the continuous values in the lower half of the table are based on t-tests.
